# Supplementary material for: Assessment of Machine Learning Models to Identify Port Jackson Shark Behaviours Using Tri-Axial Accelerometers
Source: PubMed Central journal article supplement (PMC7763149; doi:10.3390/s20247096), 2020-12-11
Supplement: sensors-20-07096-s001.pdf [file sensors-20-07096-s001.pdf]

## Supplementary Information

**Table S1.** Ethogram for behaviour labelling each behaviour event used for modelling. Note, for modelling analysis swimming (floor) and swimming (column) were combined.

| Behaviour                | Description                                                              | Label begins                                                                    | Label ends                                                             | Usually followed by (behaviour)     |
|--------------------------|--------------------------------------------------------------------------|---------------------------------------------------------------------------------|------------------------------------------------------------------------|-------------------------------------|
| <b>Resting</b>           | Immobile with both pectoral fins and tail on the floor                   | Begins when tail ceases motion and lower lobe of caudal fin first touches floor | Ends when tail first begins to undulate from straight resting position | Swimming, Chewing                   |
| <b>Swimming (floor)</b>  | Mobile with one or more fins in contact with floor                       | Begins when tail first begins to undulate from straight resting position        | Ends when movement stops and tail is no longer undulating              | Resting, Swimming (column)          |
| <b>Swimming (column)</b> | Mobile with no fins in contact with the floor                            | Begins when all fins leave the floor during swimming                            | Ends when one or more fins in contact with floor                       | Swimming (floor), Vertical Swimming |
| <b>Vertical Swimming</b> | Mobile in the water column with head upward                              | Begins when body is near perpendicular to the floor $\geq 45^\circ$ angle       | Ends when body is no longer at a $\geq 45^\circ$ angle with floor      | Swimming (column)                   |
| <b>Chewing</b>           | Masticating/moving jaw up and down (does not include coughing behaviour) | Begins when prey item first touches jaw                                         | Ends when last mastication is complete (i.e. jaw ceases movement)      | Resting                             |

**Table S2.** The numbers of behaviour events and data points per behaviour event for each of the four behaviour classes within the 1 and 2 second epochs.

| Behaviour                | Epoch            |             |          |
|--------------------------|------------------|-------------|----------|
|                          | Behaviour events | Data points |          |
|                          |                  | 1 second    | 2 second |
| <b>Resting</b>           | 122              | 1216        | 2407     |
| <b>Swimming</b>          | 183              | 1823        | 3571     |
| <b>Vertical swimming</b> | 41               | 410         | 820      |
| <b>Chewing</b>           | 74               | 734         | 1417     |
| <b>Total</b>             | 420              | 4183        | 8215     |

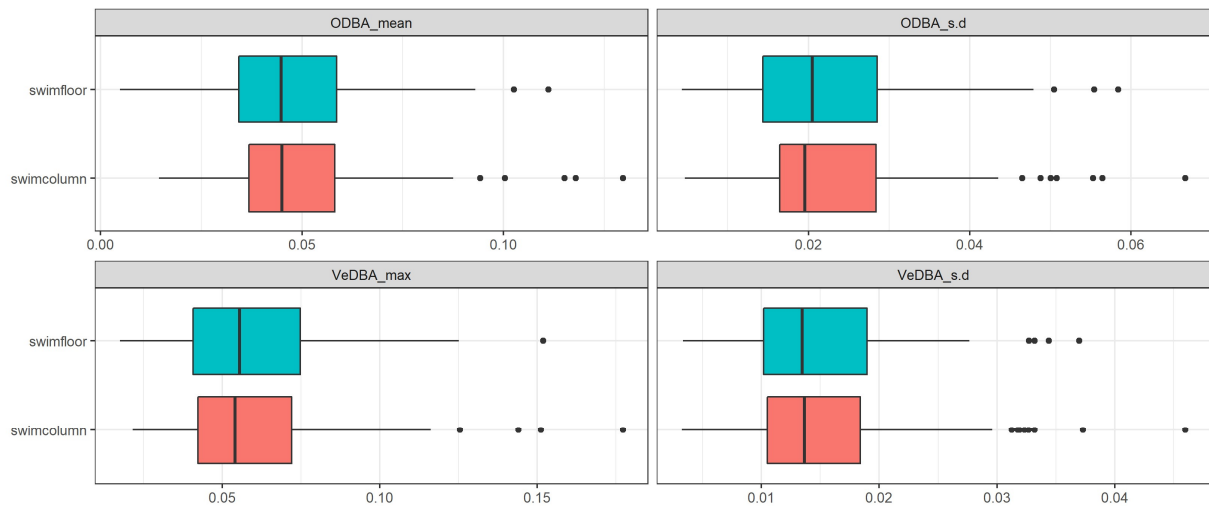

**Figure S1.** Boxplots for calculated metrics of accelerometry for behaviours: swimming on the floor (swimfloor) and swimming in the water column (swimcolumn). ODBA is overall dynamic body acceleration, VeDBA is vectorial dynamic body acceleration and s.d is standard deviation.

**Table S3.** Results of Welch two sample t-test comparing behaviour categories: swimming on the floor and swimming in the water column.

| Acceleration metric | df  | <i>p</i> | Swim column mean | Swim floor mean |
|---------------------|-----|----------|------------------|-----------------|
| ODBA mean           | 180 | 0.565    | 0.049            | 0.048           |
| ODBA SD             | 181 | 0.689    | 0.023            | 0.023           |
| VeDBA SD            | 179 | 0.576    | 0.016            | 0.015           |
| VeDBA max           | 181 | 0.70     | 0.061            | 0.06            |

**Table S4.** Best parameters for all models created using 2 s sampling epoch.

| Model  | Best Parameters                                                                                          |
|--------|----------------------------------------------------------------------------------------------------------|
| SVM    | Trials = 28; model = 2; winnow = FALSE                                                                   |
| RF     | mtry = 12                                                                                                |
| XGB    | cp = 0.00929586494283577                                                                                 |
| GBM    | size=5; decay=0.1; bag=FALSE                                                                             |
| C50    | sigma=0.0558887817581717; C=32                                                                           |
| CART   | n.trees=100; interaction.depth=2; shrinkage=0.05; n.minobsinnode=10                                      |
| Nnet   | nrounds=100; max_depth=1; eta=0.3; gamma=0; c_olsample_bytree = 0.8; min_child_weight = 1; subsample=0.5 |
| AvNnet | size = 5; decay = 0.1                                                                                    |

# SVM

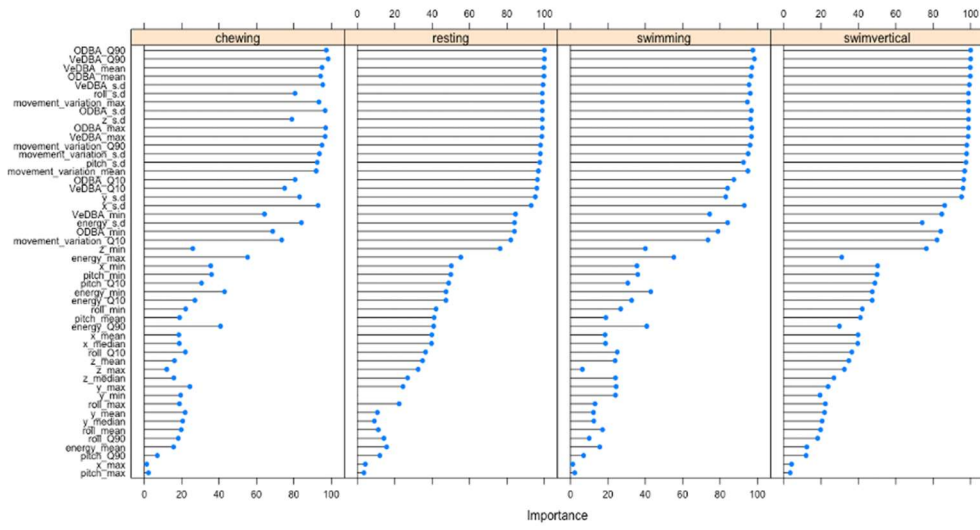

# RF

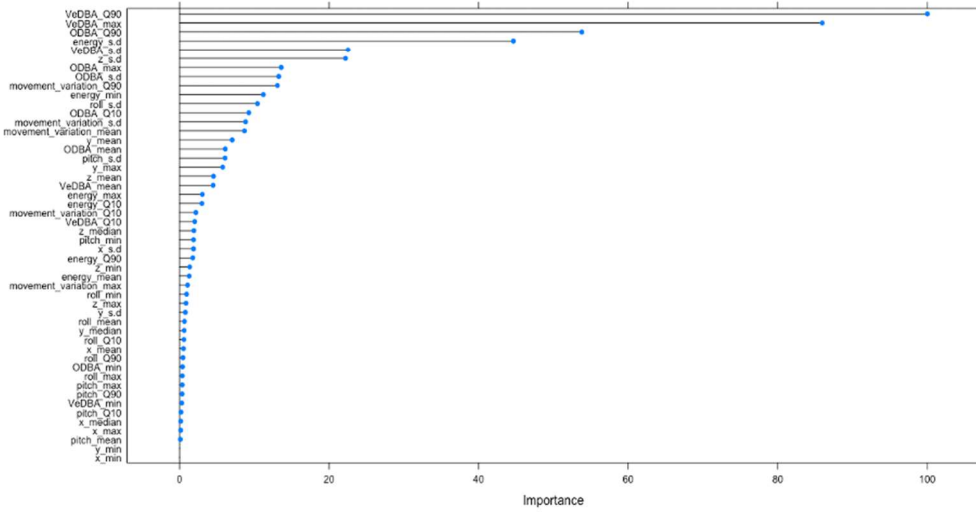

# XGB

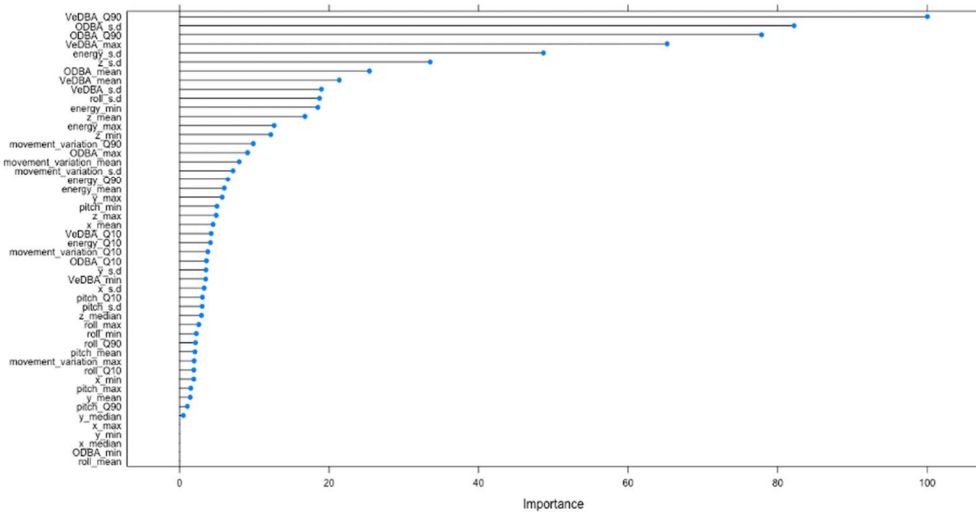

Figure S2. SVM, RF, and XGB 2 s model feature importance across four behaviour categories
